# Supplementary material for: Electrical Abnormalities in Dopaminergic Neurons of the Substantia Nigra in Mice With an Aromatic L-Amino Acid Decarboxylase Deficiency
Source: PubMed Central journal article supplement (PMC6365702; doi:10.3389/fncel.2019.00009), 2019-01-31
Supplement: Table_1.pdf [file Table_1.pdf]

**Supplemental Table 1. Gene expression in SNc of Ddc<sup>KI</sup> mice (n=3)**

| Category            | 2 <sup>-ΔCT</sup> | WT     |       | KI     |       | % of WT<br>(2 <sup>-ΔΔCT</sup> ) | P     |
|---------------------|-------------------|--------|-------|--------|-------|----------------------------------|-------|
|                     |                   | Mean   | SEM   | Mean   | SEM   |                                  |       |
| Dopaminergic neuron | <i>Th</i>         | 18.77  | 2.93  | 9.80   | 0.83  | 52.20                            | 0.050 |
|                     | <i>Drd2</i>       | 1.57   | 0.31  | 0.98   | 0.07  | 62.30                            | 0.050 |
| Calcium channel     | <i>Cacna1c</i>    | 0.68   | 0.08  | 1.35   | 0.44  | 198.20                           | 0.275 |
|                     | <i>Cacna1g</i>    | 0.15   | 0.03  | 0.24   | 0.06  | 162.90                           | 0.275 |
| Potassium channel   | <i>Kcnj13</i>     | 1.41   | 0.91  | 0.21   | 0.04  | 14.80                            | 0.275 |
|                     | <i>Kcnq4</i>      | 0.16   | 0.05  | 0.14   | 0.02  | 86.90                            | 0.513 |
|                     | <i>Kcnd3</i>      | 5.18   | 0.41  | 5.08   | 1.31  | 98.00                            | 0.827 |
|                     | <i>Kcnip3</i>     | 2.54   | 0.18  | 1.95   | 0.32  | 76.80                            | 0.275 |
|                     | <i>Kcnn3</i>      | 0.28   | 0.03  | 0.16   | 0.03  | 56.80                            | 0.050 |
|                     | <i>Hcn1</i>       | 6.19   | 2.02  | 6.26   | 0.76  | 101.00                           | 0.827 |
|                     | <i>Grid1</i>      | 0.00   | 0.00  | 0.01   | 0.00  | 296.20                           | 0.127 |
| Glutamate receptor  | <i>Grid2</i>      | 0.02   | 0.01  | 0.04   | 0.00  | 194.30                           | 0.050 |
|                     | <i>Grm1</i>       | 0.19   | 0.07  | 0.50   | 0.14  | 264.70                           | 0.127 |
|                     | <i>Grm5</i>       | 0.14   | 0.04  | 0.26   | 0.05  | 185.70                           | 0.275 |
|                     | <i>Gria1</i>      | 15.64  | 2.75  | 16.19  | 2.22  | 103.50                           | 0.827 |
|                     | <i>Gria2</i>      | 20.57  | 3.91  | 22.47  | 2.73  | 109.20                           | 0.513 |
|                     | <i>Gria3</i>      | 13.07  | 2.80  | 11.71  | 2.63  | 89.60                            | 0.513 |
|                     | <i>Gria4</i>      | 3.52   | 0.97  | 3.91   | 1.71  | 111.00                           | 0.827 |
|                     | <i>Gabbr1</i>     | 171.31 | 25.20 | 167.98 | 40.32 | 98.10                            | 0.827 |
|                     | <i>Gabbr2</i>     | 3.30   | 0.89  | 5.07   | 1.91  | 153.90                           | 0.513 |
| GABA receptor       | <i>Gabra3</i>     | 2.43   | 0.53  | 6.81   | 2.41  | 279.90                           | 0.050 |
|                     | <i>Gabbr1</i>     | 4.72   | 1.47  | 5.60   | 1.57  | 118.80                           | 0.275 |

|  |               |      |      |      |      |        |       |
|--|---------------|------|------|------|------|--------|-------|
|  | <i>Gabrg2</i> | 5.09 | 0.75 | 7.30 | 1.44 | 143.60 | 0.275 |
|--|---------------|------|------|------|------|--------|-------|
